# Supplementary material
Source: PubMed Central journal article supplement (PMC9647883)
Supplement: PEDS_2021054729SupplementaryData.pdf [file PEDS_2021054729SupplementaryData.pdf]

## Supplemental Information

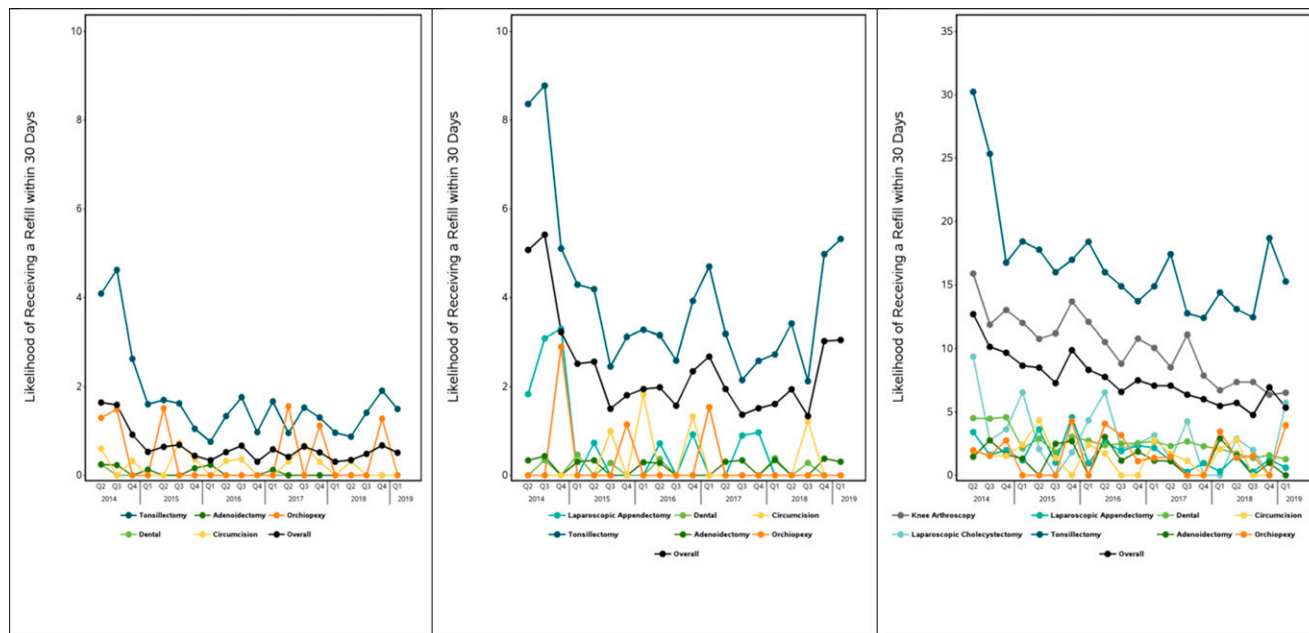

### SUPPLEMENTAL FIGURE 4

Percentage of children who received an opioid prescription refill after surgery, overall, and by procedure, 2014 to 2019. Each figure displays, by quarter and year, the percentage of children who received  $>1$  opioid prescription within 30 days of surgery. Panels contain data for the relevant procedures specific to the 3 age groups: (A) Infant to 4 years of age, (B) 5 to 10 years of age, and (C) 11 to 17 years of age.

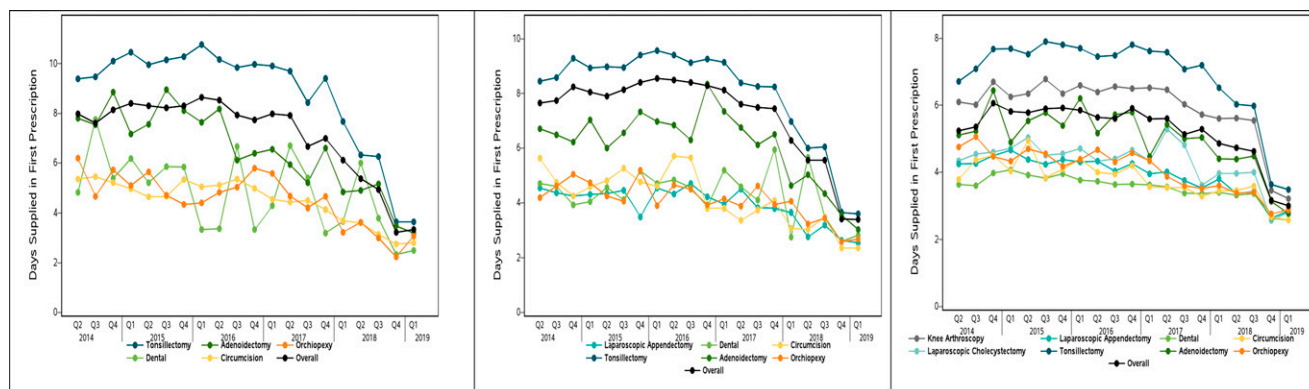

### SUPPLEMENTAL FIGURE 5

Average days dispensed in initial opioid prescription after surgery, overall, and by procedure, 2014 to 2019. Panels contain the average days of opioid supply dispensed in the first opioid prescription filled within 7 days after surgery specific to the 3 age groups: (A) Infant to 4 years of age, (B) 5 to 10 years of age, and (C) 11 to 17 years of age.

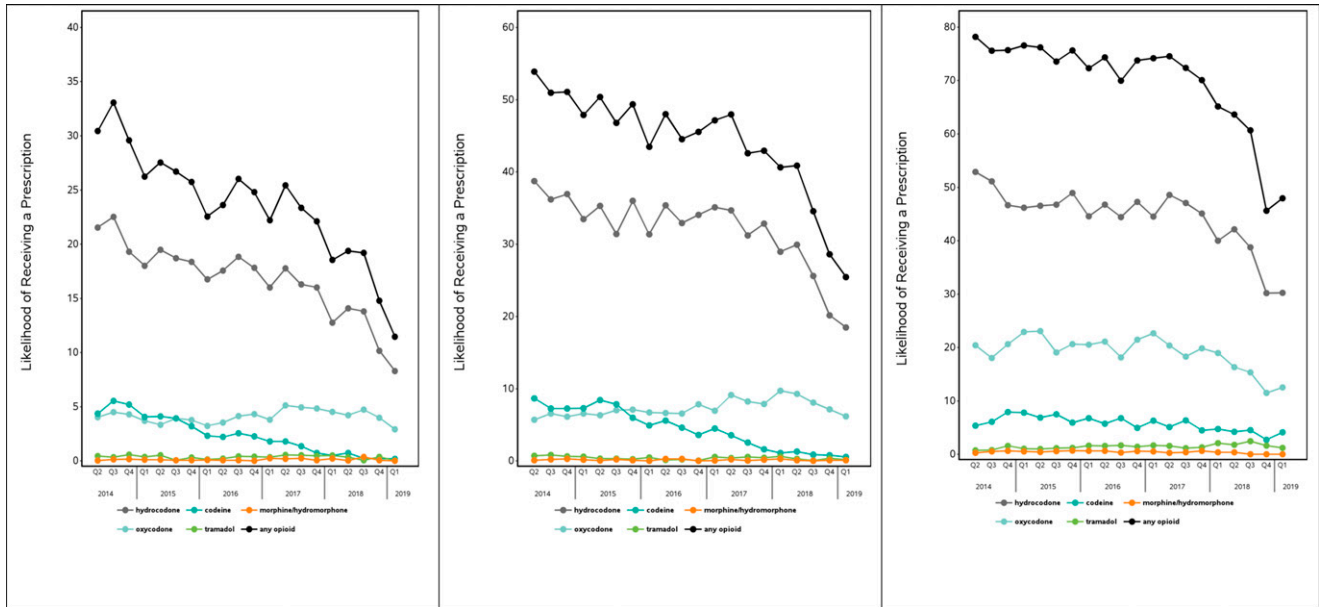

**SUPPLEMENTAL FIGURE 6**

Percentage of children who filled an opioid prescription after surgery, overall, and by opioid type, 2014 to 2019. Each figure displays, by quarter and year, the percentage of children who filled an opioid prescription within 7 days of surgery. Panels contain data for the relevant procedures specific to the 3 age groups: (A) Infant to 4 years of age, (B) 5 to 10 years of age, and (C) 11 to 17 years of age.

**SUPPLEMENTAL TABLE 3** Procedure Included in the Analysis and Associated CPT Codes

| Procedure                      | CPT codes                  |
|--------------------------------|----------------------------|
| Circumcision                   | 54150-54163                |
| Dental surgery                 | 41899                      |
| Orchiopexy                     | 54640, 54600               |
| Arthroscopic knee surgery      | 29880-29887, 29866-77      |
| Laparoscopic appendectomy      | 44970                      |
| Tonsillectomy+/- adenoidectomy | 42820, 42825, 42821, 42826 |
| Adenoidectomy only             | 42836, 42835, 42831, 42830 |
| Laparoscopic cholecystectomy   | 47562-47563                |

**SUPPLEMENTAL TABLE 4** ICD Codes for Comorbidities

| Diagnoses                  | ICD-9                                                                                              | ICD-10                                                          |
|----------------------------|----------------------------------------------------------------------------------------------------|-----------------------------------------------------------------|
| History of substance abuse | 291.0-5, 291.8-82, 305.00-03, 304.40-43, 304.30-33, 304.20-23, 292.0, 304.00-304.03, 304.10-304.13 | Part 1: F10, F11, F12, F13, F14, F15, F19 Part 2: 20-0.22, 0.23 |
| Depression                 | 296.2, 311                                                                                         | F33.0, F33.1, F33.2                                             |
| OSA                        | 327.23, 327.27, 327.21                                                                             | G47.33, G47.30                                                  |
| Overdose                   | 977.9                                                                                              | T50.901A, T50.902A, T50.903A, T50.904A                          |

**SUPPLEMENTAL TABLE 5** Patient-Level Time Series Segmented Regression Analysis: Comparison of the Likelihood of Filling a Prescription After Versus Before Joinpoint Intercepts, Adjusted for Age, Sex, Race, Surgery and OSA Diagnosis

| Age Group, y | PreJoinpoint           |       | PostJoinpoint          |       |
|--------------|------------------------|-------|------------------------|-------|
|              | Slope (95% CI)         | P     | Slope (95% CI)         | P     |
| Age <5       | -0.63 (-0.71 to -0.55) | <.001 | -2.04 (-4.40 to 0.32)  | .09   |
| Age 5-10     | -0.60 (-0.70 to -0.50) | <.001 | -3.40 (-4.75 to -2.04) | <.001 |
| Age 11-17    | -0.35 (-0.46 to -0.24) | <.001 | -5.48 (-6.06 to -4.89) | <.001 |

We included demographic covariates listed in Table 1 for each of the 3 age groups, including age in years within the specific developmental group, sex, race, surgery type, and OSA diagnosis. Slopes represent the percentage change per quarter. The model controlled for quarter with relation to the identified Joinpoint quarter and contained indicators for period (pre- versus postJoinpoint) and the interaction of quarter and period, adjusted for the covariates listed above.
